# The human frontal operculum is involved in visuomotor performance monitoring

**Felix Quirnbach<sup>1,2</sup>** and **Jakub Limanowski<sup>1,2</sup>**

*<sup>1</sup>Faculty of Psychology, Technische Universität Dresden, Dresden, Germany*

*<sup>2</sup>Centre for Tactile Internet with Human-in-the-Loop, Technische Universität Dresden, Dresden, Germany*

**Correspondence:** Felix Quirnbach, Technische Universität Dresden, CeTI – Cluster of Excellence, 01062 Dresden, Germany, Phone: +49 351 46334941, Email: [felix.quirnbach@tu-dresden.de](mailto:felix.quirnbach@tu-dresden.de)

## Abstract

1 For adaptive goal-directed action, the brain needs to monitor action performance and detect errors.  
2 The corresponding information may be conveyed via different sensory modalities; for instance, visual  
3 and proprioceptive body position cues may inform about current manual action performance.  
4 Thereby, contextual factors such as the current task set may also determine the relative importance  
5 of each sensory modality for action guidance. Here, we analysed human behavioral, fMRI, and MEG  
6 data from two VR-based hand-target phase matching studies to identify the neuronal correlates of  
7 performance monitoring and error processing under instructed visual or proprioceptive task sets. Our  
8 main result was a general, modality-independent response of the bilateral FO to poor phase matching  
9 accuracy, as evident from increased BOLD signal and increased gamma power. Furthermore, functional  
10 connectivity of the bilateral FO to the right PPC increased under a visual vs proprioceptive task set.  
11 These findings suggest that the bilateral FO generally monitors manual action performance; and,  
12 moreover, that when visual action feedback is used to guide action, the FO may signal an increased  
13 need for control to visuomotor regions in the right PPC following errors.

**Key words:** Action; frontal operculum; sensorimotor integration; performance monitoring; visuo-  
proprioceptive integration

## 14 Introduction

15 To effectively perform goal-directed action in the environment, the brain needs to monitor motor  
16 performance and detect errors, so that it can enable adaptive changes in behavior (Diedrichsen, 2005;  
17 Klein et al., 2007; Suminski et al., 2007; Ullsperger et al., 2014). During performance monitoring, the  
18 predicted outcome of one's actions selected based on current goals (i.e., task set) is compared with  
19 actual sensory feedback, and behavioural changes are initiated if a mismatch between both is detected  
20 (Ullsperger et al., 2014). The neurofunctional basis of performance monitoring and error correction  
21 has been illuminated by recent brain imaging and electrophysiological work. Specifically, a 'salience  
22 network' comprising, among others, the dorsal anterior cingulate cortex, the bilateral insular cortex  
23 and the inferior frontal gyri, is assumed to integrate sensory input, responding to behaviourally salient  
24 stimuli—behavioural errors—with increased activation (Ham et al., 2013; Seeley et al., 2007; Sridharan  
25 et al., 2008; Uddin, 2021). Thereby regions like e.g. the frontal operculum (FO, also anterior insular  
26 cortex, IC(Billeke et al., 2020; Cieslik et al., 2015; Higo et al., 2011; Klein et al., 2013; Sridharan et al.,  
27 2008) may signal a need for increased cognitive control to the executive control network, consisting  
28 (among other regions) of the lateral prefrontal cortices, the posterior parietal cortex, pre-  
29 supplementary motor area and the inferior parietal lobule(Uddin, 2021; Ullsperger et al., 2010). This  
30 network, in turn, may direct attentional resources to the relevant stimuli, driving behavioural  
31 adaptations (Menon & Uddin, 2010; Sridharan et al., 2008).

32 Notably, action performance and error may be conveyed via different sensory modalities; in manual  
33 action, for instance, via visual and proprioceptive cues about body position. In the context of body  
34 representation for action, visual and proprioceptive body position cues can be weighted depending on  
35 the current context; e.g., based on their relative relevance for the specific task at hand (Lebar et al.,  
36 2017; Sober & Sabes, 2005; van Beers et al., 1999). Recently, we have used virtual reality (VR) to  
37 examine this contextual sensory weighting during action under conflicting visual (virtual) and  
38 proprioceptive (real, unseen) body position feedback. Our functional magnetic resonance imaging  
39 (fMRI) and magnetoencephalography (MEG) studies (Limanowski et al., 2020; Limanowski & Friston,

40 2020) specifically shed light on the effects of adopting a visual vs proprioceptive attentional set during  
41 goal-directed manual action tasks, demonstrating that participants' can prioritise either modality over  
42 the other; and we observed corresponding changes of neuronal gain in the respective sensory (visual  
43 and proprioceptive) brain regions. However, while the effects of adopting an attentional set on sensory  
44 processing could be seen clearly, these studies did not investigate the specific neural correlates of  
45 flexible performance monitoring in these settings.

46 Here, we aimed to close this gap. We therefore re-analysed the behavioural, fMRI, and MEG data from  
47 the above studies, correlating participants' task performance with hemodynamic and oscillatory  
48 activity. Based on the above literature, we expected task inaccuracy to be reflected by activity in the  
49 performance monitoring network and, potentially, also in fronto-parietal attentional areas. Our second  
50 research question was whether performance monitoring would be modality specific (i.e., involve  
51 different brain regions when vision vs proprioception was task relevant) or general. Therefore, we also  
52 tested for task set dependent differences in brain activity and connectivity.

## 53 Materials and Methods

### 54 Participants

55 For this study, we reanalysed fMRI and MEG data acquired by (Limanowski et al., 2020; Limanowski &  
56 Friston, 2020). Healthy, right-handed volunteers with normal or corrected-to-normal vision  
57 participated in both experiments after providing written informed consent. The fMRI study included  
58 16 subjects (8 female, mean age 27, range 21-37), the MEG study in included 18 subjects (9 female,  
59 mean age 29, range 21-39). Both experiments were approved by the local research ethics committee  
60 (University College London) and conducted in accordance with these approvals.

### 61 Experimental design and task

62 Participants wore an MR compatible data glove (5DT Data Glove MRI, 1 sensor per finger, 8 bit flexure  
63 resolution per sensor, 60 Hz sampling rate, communication with the PC via USB) on their right hand.  
64 The glove measured each finger's flexion via sewn-in optical fibre cables, and was carefully calibrated  
65 to fit each participant's movement range prior to scanning. Recorded hand movement data was used  
66 to control a photorealistic virtual hand (VH) model, moving in accordance to the participant's hand  
67 movements and presented as part of a virtual reality task environment. This virtual environment,  
68 consisting of the VH, a fixation dot and task instructions, was created in the open-source 3D computer  
69 graphics software Blender (<http://blender.org>). The environment was presented via a projector on a  
70 screen (for details see (Limanowski et al., 2020; Limanowski & Friston, 2020).

71 Participants were instructed to perform repetitive right-hand grasping movements, paced by  
72 oscillatory (0.5 Hz) size changes (12%) of the central fixation dot, resulting in a non-spatial phase  
73 matching task: Thus, participants had to match the fully open hand position with the biggest dot size  
74 and, conversely, the fully closed hand with minimal dot size. They performed the task in movement  
75 blocks of 32 s (16 close-and-open movements; the last movement was signaled by brief blinking of  
76 fixation dot), separated by 16 s rest periods during which only the fixation dot was visible. All  
77 participants trained extensively before scanning. Note that this task was, therefore, not designed to

78 investigate visuomotor adaptation or learning, but maintaining hand-target phase matching during a  
79 sustained visual vs proprioceptive attentional task set.

80 Before the start of each movement block, participants were instructed to match the phase of the  
81 fixation dot with either the seen VH model or their unseen real hand. In half of the conditions, a lag  
82 was introduced to the virtual hand's movements; i.e., the virtual hand movements lagged behind the  
83 actually executed movements. In the fMRI experiment, a lag of 267 ms was introduced in the second  
84 half of each movement block; in the MEG experiment, a lag of 500 ms was presented as a separate  
85 block. Note that under incongruence, only one modality could be aligned with the target phase, which  
86 resulted in a misalignment of the other one. The task instruction ('VIRTUAL' or 'REAL') were presented  
87 2.5 s before start of each movement block for 2 s, and the color of the fixation dot reminded  
88 participants of the current condition thorough the block. In the fMRI experiment (Limanowski &  
89 Friston, 2020), we had additionally varied the visibility (high or low) of the virtual hand during half of  
90 the movement blocks. However, we found no differences in performance between different visibility  
91 levels; and in our present reanalysis, there were no significant differences between visibility levels  
92 either. Therefore, we present the differential fMRI task contrasts in terms of VH vs RH task, summing  
93 over high and low visibility levels in each condition. In sum, despite minor technical differences  
94 between fMRI and MEG experiments, both can be described as a balanced 2 x 2 factorial design with  
95 the factors *task* (VH vs RH) and *congruence* (congruent vs incongruent).

## 96 Behavioural Data Analysis

97 In our previous analyses, we examined the neuronal correlates of the instructed task set; and only  
98 analysed condition specific differences in average performance (Limanowski et al., 2020; Limanowski  
99 & Friston, 2020). In the present study, we examined the neuronal correlates of phase matching  
100 *accuracy* (i.e., *fluctuations* around those average performances).

101 To quantify hand-target phase matching (in)accuracy, we calculated the root mean square error  
102 (RMSE) of the difference between the target position (i.e., the position within the oscillatory cycle) and

103 the position of the task relevant hand (i.e., the position within the grasping cycle, averaging the  
104 recorded finger position data per hand). Thus, the virtual hand position was evaluated for the VH  
105 condition movements and the real hand position for the RH condition. For construction of the  
106 fMRI/MEG regressors, we binned the resulting RSME values into 1 s time windows, each centred on a  
107 time point of minimum or maximum target size, corresponding to the hand fully closed or opened if  
108 moved synchronously with the target. To focus on within-subject fluctuations in performance, rather  
109 than between-subject differences, the overall RSME across the entire experiment was normalized for  
110 each single subject (i.e. minimum and maximum performance error value was equal across  
111 participants; 0 and 1, respectively). The resulting RSME values were assigned to one regressor per  
112 experimental condition (VH congruent, VH incongruent, RH congruent, RH incongruent), and de-  
113 meaned separately to reflect only variation around the condition mean. To evaluate if the variance of  
114 the phase matching differed between the VH and RH conditions, we calculated a paired t-test on the  
115 participants' variance of phase matching RMSE within each condition.

116 The amplitude of the hand movement at each time point was calculated via a cubic spline interpolation  
117 of the respective minimum and maximum hand position values in each time window. The resulting  
118 time series was de-meaned per condition as well, and used as noise regressor for the following fMRI  
119 and MEG analysis (see below). Additionally, we tested for correlations between performance error and  
120 movement amplitude by calculating the Pearson correlation coefficient of both regressors for each  
121 participant; and testing it for significance (i.e., significant difference from zero) with a t-test on the  
122 group level. Similarly, we calculated the correlation between performance error and fMRI head  
123 movements (realignment parameters), via subject-level Pearson correlation and group-level t-test,  
124 adjusted for multiple comparisons for the six realignment parameters. All analyses were performed  
125 using MATLAB (MathWorks, Natick, MA, United States).

## 126 FMRI Data Preprocessing and Analysis

127 All analyses were performed using MATLAB (MathWorks, Natick, MA, United States) and SPM12.6  
128 (Wellcome Trust Centre for Neuroimaging, University College London,  
129 <https://www.fil.ion.ucl.ac.uk/spm/>).

130 We reused the preprocessed fMRI data by (Limanowski & Friston, 2020). The fMRI data had been  
131 acquired using a 3T scanner (Magnetom TIM Trio, Siemens), equipped with a  
132 64-channel head coil.  $T_2^*$ -weighted images were acquired using gradient echo-planar imaging  
133 sequence (voxel size= 3 x 3 x 3 mm<sup>3</sup>, matrix size= 64 x 72, TR = 3.36 s, TE = 30 ms, flip angle = 90°).

134 We fitted a general linear model (GLM, 128 s high-pass filter) to each participant. Each condition (VH,  
135 RH) was modelled with a boxcar function as a 32 s movement block; we added a parametric modulator  
136 (1/-1) to each condition encoding the first half of each block as congruent (-1) and the second half as  
137 incongruent (1) movement periods. Additionally, we included a regressor encoding the (de-meaned)  
138 RSME values for each conditions; the values were re-sampled to match the 3.36 s scan length prior to  
139 this. Regressors modelling the task instructions and movement amplitude were added to the GLM  
140 alongside the realignment parameters as regressors of no interest.

141 For each subject, we calculated contrast images of each RSME regressor against the baseline. These  
142 were then entered into a group-level flexible factorial design, with the factors *task* (VH or RH) and  
143 *congruence* (congruent, incongruent), and an additional factor modelling the subject constants. To  
144 assess potential differences between congruent and incongruent movement periods, we calculated  
145 separate first-level GLMs, in which the RSME values of the second movement half were inverted; this  
146 effectively encoded the contrast congruent-incongruent. The resulting contrast images were entered  
147 into an analogous group-level GLM as described above.

148 Group-level results were assessed for statistical significance using a voxel-wise threshold of  $p < 0.05$ ,  
149 family-wise error ( $p_{FWE}$ ) corrected for multiple comparisons. We projected the resulting statistical maps  
150 onto the mean normalized structural image or rendered it on SPM12's brain template. The



151 unthresholded T-maps corresponding to the contrasts reported here can be inspected online at  
152 <https://neurovault.org/collections/GGWQTGSI>. For anatomical reference we used the SPM Anatomy  
153 toolbox (Eickhoff et al., 2005).

## 154 MEG Data Preprocessing and Analysis

155 MEG signals had been acquired using a 275-channel whole-head setup with third-order gradiometers  
156 (CTF Omega, CTF MEG International Services LP, Coquitlam, Canada) at a sampling rate of 600 Hz.  
157 Following the original analysis by (Limanowski et al., 2020), the MEG data were high-pass filtered  
158 (1 Hz), downsampled to 300 Hz, and epoched into trials of 2 s each (each corresponding to a full target  
159 oscillation/grasping cycle).

160 In the main (sensor space) MEG data analysis, we looked for spectral power differences under ‘steady-  
161 state’ assumptions; i.e., treating the spectral profile as a ‘snapshot’ of performance dependent  
162 responses as manifest in quasi-stationary power spectra (Donner & Siegel, 2011; Friston et al., 2019;  
163 Moran et al., 2008). We computed trial-by-trial power spectra in the 0-98 Hz range using a multi-taper  
164 spectral decomposition (Thomson, 1982) with a spectral resolution of  $\pm 2$  Hz. The spectra were log-  
165 transformed, converted to volumetric scalp x frequency images—one image per trial—with two spatial  
166 and one frequency dimension (Kilner & Friston, 2010), and smoothed with a Gaussian kernel with full  
167 width at half maximum of 8 mm x 8 mm x 4 Hz. The resulting images were entered into a general linear  
168 model (GLM) using a within-subject ANOVA with the respective RSME values as a covariate (first-level  
169 analysis). As in the fMRI analysis, movement amplitude was moreover included as a covariate of no  
170 interest to capture movement related fluctuations. Contrast images were then calculated for each  
171 condition’s accuracy covariate. These contrast images were then entered into a group-level GLM using  
172 a flexible factorial design including the two within-subject experimental factors (task and congruence),  
173 and a factor modelling the between subject variance. The statistical parametric maps obtained from  
174 the respective group-level contrasts were evaluated for significant effects using a threshold of  $p < 0.05$ ,  
175 family-wise error ( $p_{FWE}$ ) corrected for multiple comparisons at the peak (voxel) level.

176 As a post-hoc analysis, source localization of trial-by-trial correlation of gamma band power with  
177 performance error was performed using a variational Bayesian approach with multiple sparse priors  
178 (Litvak & Friston, 2008). Source localization was performed in the 34-88 Hz range (which was the range  
179 of effects in the spectral analysis thresholded at  $p < 0.001$ , uncorrected). As we had already performed  
180 an analogous localization on the fMRI data (see above), we could use the superior spatial acuity of  
181 fMRI to improve MEG source localization; i.e., the fMRI activations (thresholded at  $p < 0.001$ ,  
182 uncorrected) were used as empirical (spatial) priors for the Bayesian inversion routine (Henson et al.,  
183 2010; López et al., 2014). For comparison, we also reconstructed the sources using a Bayesian  
184 beamforming approach (Belardinelli et al., 2012). This produced very similar results; i.e., the strongest  
185 effects were localized to the bilateral inferior frontal gyri, including the FO (a further, weaker source  
186 was localized to the primary visual cortex). The results of this source localization were summarized as  
187 3D images and entered into a group-level t-test. Since the significance of the effects on spectral  
188 responses had already been established with the sensor space analysis, the ensuing statistical  
189 parametric maps were displayed at a threshold of  $p < 0.05$ , uncorrected, rendered on SPM's smoothed  
190 average brain template. The unthresholded T-map corresponding to the source localization can be  
191 inspected online at <https://neurovault.org/collections/GGWQTGSI>.

## 192 FMRI functional connectivity analysis

193 In our main analysis (see above), we identified brain areas that showed a significance response to  
194 phase matching inaccuracy. The fMRI and MEG results consistently highlighted the bilateral FO (while  
195 further fMRI activations were found in the SMA and the dIPFC).

196 In our original analyses (Limanowski et al., 2020; Limanowski & Friston, 2020), the FO did not show any  
197 task specific effects (i.e., activity differences between VH and RH tasks) per se, neither did the SMA or  
198 the dIPFC. However, following the clear response of the FO to poor task performance in general, we  
199 now asked whether these areas would change their connectivity to other (potentially, task relevant)  
200 brain areas depending on whether the inaccuracy was registered during the VH or RH task; i.e., while  
201 participants focused either on visual (VH) or proprioceptive (RH) action feedback.

202 To answer this question, we used psychophysiological interaction (PPI) analysis for fMRI data. This  
203 analysis aims to explain neuronal activity other brain areas in terms of an interaction between  
204 psychological factors (the specific task condition) and physiological factors (the BOLD signal time  
205 course in the region of interest (Friston et al., 1997; O'Reilly et al., 2012). The resulting interaction (PPI)  
206 reveals voxels in the brain increase their connectivity with a specific seed region in a given context;  
207 e.g., in a specific task condition. Note that task dependent changes in connectivity per se (i.e., between  
208 VH and RH task sets) were identified in both fMRI and MEG data sets (Limanowski et al., 2020;  
209 Limanowski & Friston, 2020). However, in the fMRI data, the SPM approach allowed us to select a  
210 spatially isolated volume of interest (i.e., voxels from the FO) that was not part of the original  
211 connectivity analysis. This was not analogously possible for the MEG data, which in the original  
212 connectivity analysis were modelled on the whole-scalp level (Limanowski et al., 2020). Therefore, we  
213 limited the connectivity analysis to the fMRI data.

214 For the PPI analysis, we calculated separate GLMs with concatenated runs for each participant, and  
215 thus identified subject-specific peaks of the main effects observed on the group level. The individual  
216 peaks were defined as the maximum effect within a 10 mm radius sphere of the respective group-level  
217 maximum (see Table 1). From these individual peaks, we extracted the BOLD signal of the seed regions,  
218 as the first eigenvariate of activity across all voxels in a 4 mm radius sphere centred on the participant-  
219 specific peak. For three subjects where no effect could be identified for the specific SMA seed region  
220 as well as one case where no effect was found for the dlPFC region, we resorted to the group level  
221 maximum for seed region localization.

222 The SPM12.6 PPI routine was then used to form the interaction between the psychological factor and  
223 the seed region's summarized BOLD signal time course. Note that while the seed regions were  
224 identified per their significant response to phase matching inaccuracy (Fig. 2), our psychological factor  
225 was the task set; i.e., the instructed hand modality at the beginning of each movement block (VH vs  
226 RH; pooled over different levels of virtual hand visibility, see above). After forming the interaction

227 term, a second GLM was constructed for each participant, including the interaction, the seed region's  
228 extracted signal, the task set and the realignment parameters as regressors of no interest.  
229 On the group-level, the connectivity of the bilateral FO was evaluated using a paired t-test; i.e., a GLM  
230 including the PPI contrast images of the left and right FO of each participant, and another factor  
231 modelling the between-participant variance. We also tested whether the other two regions showing  
232 significant responses to phase matching inaccuracy (SMA and dIPFC) would exhibit connectivity  
233 changes, using a similar approach.

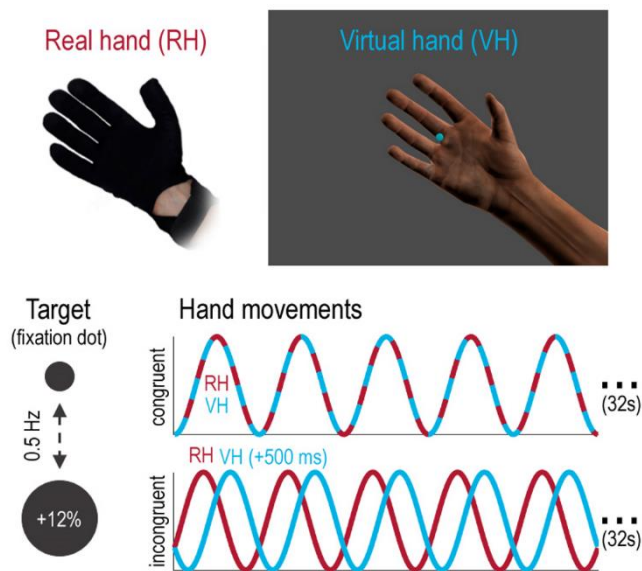

**Figure 1. Phase matching task.** Participants controlled a photorealistic virtual hand model (VH) with a data glove worn on their real hand (RH); the RH was occluded from view, while participants saw the VH at all times. Participants had to match the oscillatory phase of a virtual target (fixation dot, changing its size sinusoidally at 0.5 Hz) with right hand grasping movements (i.e., open at maximum target size, closed at minimum size). Thereby, participants were instructed to match the target's oscillatory phase with the grasping movements of *either* the VH *or* the unseen RH. These instructions were intended to induce a specific task set, in which either visual or proprioceptive movement information was task relevant. In half of all trials, RH and VH moved congruently ('congruent'), while in the other half of the trials ('incongruent'), the movements of the VH were delayed (e.g., by 500 ms) with respect to the actually executed movements (RH); this introduced visuo-proprioceptive incongruence. Reprinted from Limanowski et al. (2020).

## 234 Results

### 235 Behavioural results

236 In both studies, participants were able to follow the task instructions; i.e., to keep the instructed  
237 modality's (vision or proprioception) grasping movements aligned with the phase of the dot (see the  
238 original studies, Limanowski et al., 2020; Limanowski & Friston, 2020, for details and condition specific  
239 differences between task performance). In the MEG data, phase matching was on average significantly  
240 more variable in the RH compared to the VH conditions ( $t_{(17)} = 2.27, p < 0.05$ ); but this was not the case  
241 in the fMRI data ( $t_{(15)} = 0.55, n.s.$ ). On average, phase matching accuracy correlated weakly but  
242 significantly with movement amplitude (mean Pearson's  $r = .27, t_{(15)} = 6.69, p < 0.001$  for fMRI; mean  $r$   
243  $= .18, t_{(17)} = 5.08, p < 0.001$  for MEG) but not significantly with the fMRI realignment parameters (all  
244  $|r| < 0.02, n.s.$ ).

### 245 FMRI results

246 In our main fMRI analysis, we sought to identify brain regions in which neuronal activity correlated  
247 with phase matching (in)accuracy (Fig. 2). A significant ( $p_{\text{FWE}} < 0.05$ ) main effect of inaccuracy was  
248 observed in the bilateral FO, the left SMA, and the left dIPFC (see Table 1 and Fig. 2). More liberal  
249 thresholds ( $p < 0.001$ , uncorrected) revealed further activation clusters in the right middle and superior  
250 frontal gyri, the precuneus, the medial cingulate cortex (MCC), the right middle temporal gyrus (MTG),  
251 and bilaterally in the cerebellum (cf. the render in Fig. 2). Conversely, a significant main effect of  
252 accuracy was found in the left pre- and postcentral gyrus, corresponding to the primary motor cortex  
253 (M1). No other comparisons (i.e., contrasting the effects of accuracy between task conditions, delay,  
254 or visual salience levels; see Methods) yielded significant effects. At uncorrected thresholds ( $p < 0.001$ ),  
255 voxels in several brain areas showed a stronger correlation with task inaccuracy under the VH task than  
256 under the RH task; namely, in the MCC, the bilateral FO, the right MTG, the left cerebellum, the right  
257 dIPFC, and the bilateral posterior parietal cortex (PPC, peak within the intraparietal sulcus, IPS).

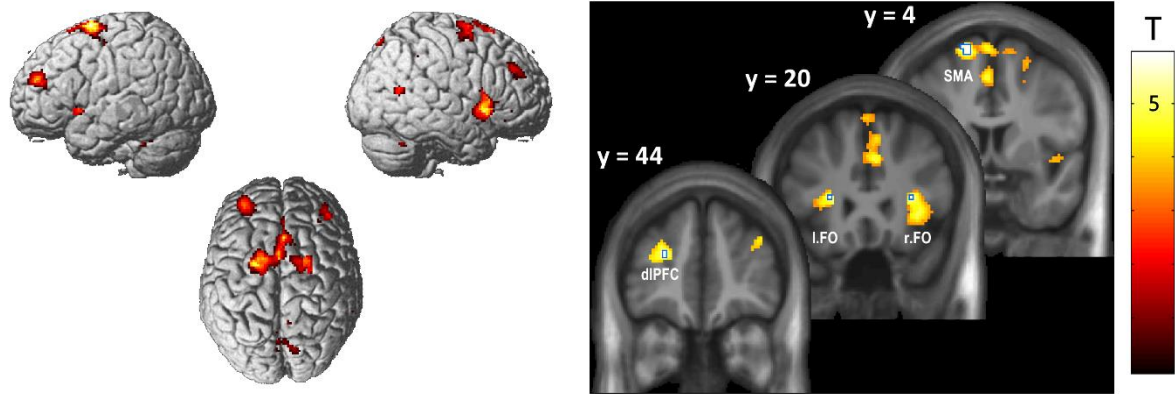

**Figure 2. BOLD signal increases related to phase matching inaccuracy.** The renders (left) and slice overlays (right) show brain areas in which hemodynamic activity was correlated with the relative inaccuracy of hand-target phase matching (displayed at  $p < 0.001$ , uncorrected). Significant activations ( $p_{FWE} < 0.05$ ; voxels outlined in blue on the slice overlays) were located in the bilateral FO, the left SMA, and the left dIPFC.

**Table 1.** Significant ( $p_{FWE} < 0.05$ ) activations for all reported fMRI contrasts.

| Anatomical location                               | Voxels | MNI (x, y, z) |     |    | Peak T | Peak $p_{FWE}$ |
|---------------------------------------------------|--------|---------------|-----|----|--------|----------------|
| <b>Correlation with phase matching inaccuracy</b> |        |               |     |    |        |                |
| L. Insula (FO)                                    | 1      | -26           | 20  | 12 | 5.92   | 0.012          |
| L. Superior frontal gyrus (SMA)                   | 13     | -16           | 4   | 70 | 5.90   | 0.014          |
| L. Middle frontal gyrus / frontal pole<br>(dIPFC) | 2      | -26           | 44  | 24 | 5.80   | 0.018          |
| R. Insula (FO)                                    | 3      | 30            | 22  | 12 | 5.72   | 0.023          |
| <b>Correlation with phase matching accuracy</b>   |        |               |     |    |        |                |
| L. Pre- and postcentral gyrus (M1)                | 6      | -32           | -18 | 38 | 6.18   | 0.006          |
|                                                   | 3      | -28           | -22 | 66 | 5.78   | 0.019          |
|                                                   | 1      | -24           | -24 | 62 | 5.49   | 0.044          |

## 258 MEG results

259 The MEG sensor space analysis revealed that phase matching inaccuracy was associated with  
 260 significantly increased spectral power in the gamma frequency range over mid-frontal sensors (main  
 261 effect; peak at 52 Hz,  $T = 5.31$ ,  $p_{FWE} < 0.05$ ; see Fig. 3A). These spectral effects were source-localized to  
 262 the bilateral inferior frontal gyri, including the bilateral FO (Fig. 3B). No other spectral power

263 comparisons yielded statistically significant results; but there was a statistical trend suggesting  
264 inaccuracy was associated with reduced alpha (8 Hz) power over posterior sensors ( $T = 4.61$ ,  $p_{FWE} =$   
265  $0.069$ ).

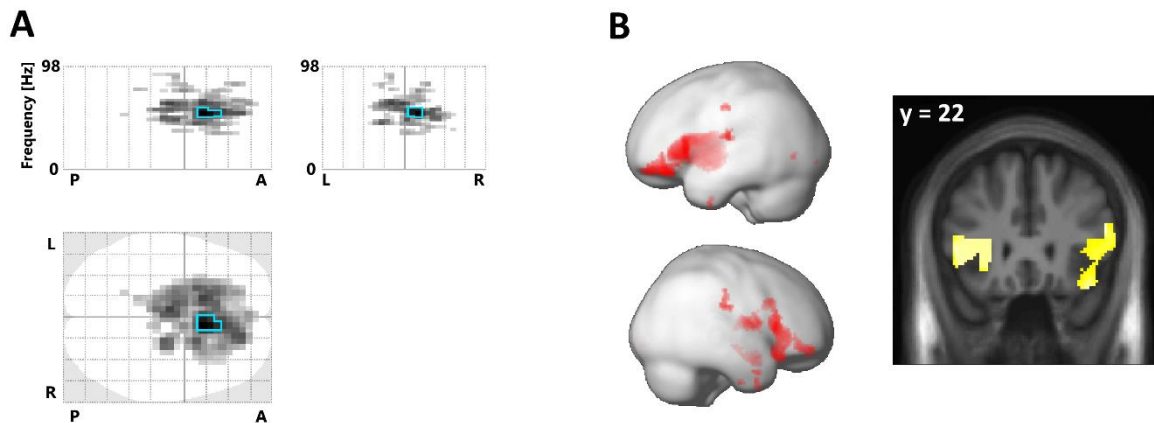

**Figure 3. Spectral power increases related to phase matching inaccuracy.** **A:** The ‘glass brain’ (maximum intensity) projections show the sensor level scalp-frequency maps of spectral power correlated with the relative inaccuracy of hand-target phase matching (the darkest voxels show the strongest effect along the respective projection; the maps are thresholded at  $p < 0.001$ , effects significant at  $p_{FWE} < 0.05$  are outlined in blue; the top plots have one frequency dimension, 0 - 98 Hz, and one spatial dimension, P - A = posterior-anterior, L - R = left-right; the bottom plot has two spatial dimensions). **B:** Renders (left) and slice overlay (right) showing the corresponding source localization of the correlation to regions around the FO.

## 266 Functional connectivity analysis

267 The above fMRI activations and source-localized MEG gamma power consistently suggested that  
268 periods of poor phase matching activated the bilateral FO, in line with previous literature that had  
269 established this region’s role in error processing and performance monitoring (see Introduction).  
270 However, we did not find any significant difference between conditions (i.e., between visual and  
271 proprioceptive task sets). Therefore, we next performed a connectivity (PPI) analysis on the fMRI data  
272 to explore whether task relevant brain areas would change their connectivity to the FO depending on  
273 the instructed task condition (VH or RH).

274 This analysis revealed a significantly increased coupling of several brain areas with the bilateral FO  
275 during the VH task > RH task, most strongly expressed in the right inferior parietal lobe (IPL, see Fig.  
276 4A and Table 2). The increase in coupling with the right IPL was evident for both the left and right FO  
277 independently, as revealed by an additional ‘null’ conjunction analysis (Fig. 4B; i.e., a conjunction of

278 voxels activated in the PPI with the left FO and PPI with the right FO, each thresholded at  $p < 0.001$ ,  
 279 uncorrected). Correspondingly, there were no significant differences in coupling between the left and  
 280 right FO. A supplementary analysis testing for potential coupling differences with the FO during VH  
 281 incong vs VH cong yielded no significant effects, either. There were no significant connectivity changes  
 282 with the FO under the RH task > VH task. No significant changes in connectivity were observed in  
 283 analogous analyses calculated for the SMA or the dIPFC, the other two brain regions showing  
 284 significant effects in the main analysis (see above).

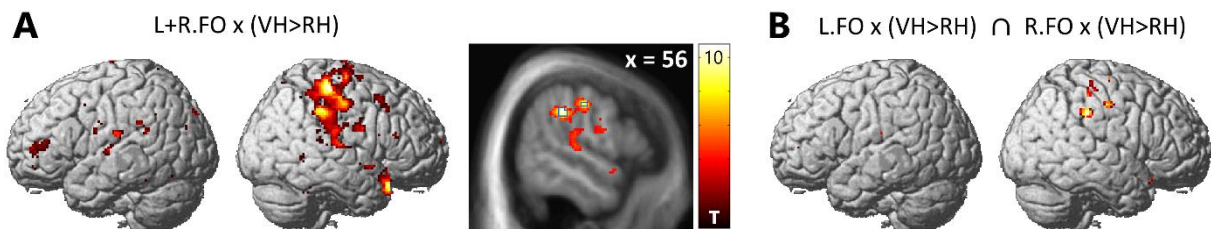

**Figure 4. Task-dependent connectivity changes of the bilateral FO. A:** Brain areas showing increased coupling with the bilateral FO during the VH task relative to the RH task (displayed at  $p < 0.001$ , uncorrected). The strongest effects were located in the right IPL (voxels significant at  $p_{FWE} < 0.05$  are outlined in blue). **B:** A corresponding ‘null’ conjunction contrasts confirmed this increased task dependent coupling with the right IPL for the left and right FO independently (each PPI contrast thresholded at  $p < 0.001$ , uncorrected).

**Table 2.** Brain areas showing significant ( $p_{FWE} < 0.05$ ) coupling increases with the bilateral FO during the VH task > RH task.

| Anatomical location                                          | Voxels | MNI (x, y, z) |     |     | Peak T | Peak $p_{FWE}$ |
|--------------------------------------------------------------|--------|---------------|-----|-----|--------|----------------|
| R. Inferior parietal lobe /<br>supramarginal gyrus (IPL/SMG) | 15     | 56            | -32 | 38  | 10.71  | 0.002          |
| R. Postcentral gyrus (S1)                                    | 4      | 54            | -14 | 44  | 9.26   | 0.012          |
| R. Precentral Gyrus (M1)                                     | 1      | 4             | -24 | 48  | 9.02   | 0.017          |
| R. Temporal Pole                                             | 2      | 52            | 20  | -22 | 8.83   | 0.022          |
|                                                              | 2      | 40            | 22  | -24 | 8.68   | 0.027          |



## 285 Discussion

286 We used data from a virtual reality-based hand-target phase matching task to identify the  
287 hemodynamic and oscillatory correlates of performance (i.e., phase matching accuracy) monitoring  
288 under instructed task relevance of visual or proprioceptive hand position feedback. Our main result  
289 was a general, modality-independent response of the bilateral FO to poor phase matching accuracy,  
290 as evident from increased BOLD signal levels and increased gamma power. Furthermore, connectivity  
291 of the bilateral FO to the right PPC/IPL increased while participants executed the phase matching task  
292 with the visible virtual hand, compared to when they executed it with the real, unseen hand.

293 The observed general *BOLD signal increase* in the bilateral FO with task (phase matching) inaccuracy  
294 confirms observations of numerous previous studies, where BOLD signal in the FO increased in  
295 response to performance errors. For instance, the FO was activated by error trials vs correct trials in  
296 the Simon task (Danielmeier et al., 2011; Ham et al., 2013); in an antisaccade task (Klein et al., 2007);  
297 and in a flanker task (Eichele et al., 2008). Similarly, FO error-related BOLD signal increases were  
298 observed in visuomotor adaptation tasks (Grafton et al., 2008) and in response to tactile ‘oddball’  
299 stimuli (Allen et al., 2016). Some studies found activation of the FO correlated positively with task  
300 performance (Bunge et al., 2015; Wager et al., 2005). This could, however, be explained with an  
301 general underlying function of FO activation in performance monitoring; acting not as an error signal  
302 per se, but as part of a mechanism to improve performance in response to errors (cf. Eichele et al.,  
303 2008). Thus, it has been proposed that neuronal activity in the FO may indicate the need for increased  
304 allocation of attentional resources to specific stimuli to achieve task-appropriate behaviour (Cieslik et  
305 al., 2015; Ham et al., 2013; Langner & Eickhoff, 2013; Uddin, 2021). Additionally, due to FO’s reciprocal  
306 connections to multiple sensory, limbic, and association areas (Sridharan et al., 2008), it may act as  
307 crucial ‘relay’ station for switching between different task relevant networks, e.g. switching from  
308 default network to executive control network (Klein et al., 2007; Menon & Uddin, 2010; Sridharan et  
309 al., 2008; Ullsperger et al., 2010).

310 The *spectral correlates* of task inaccuracy were expressed in the gamma frequency range; and, notably  
311 in agreement with the BOLD signal increases, they were source-localized to the bilateral FO (as part of  
312 larger sources in the IFG). A general correspondence and spatial co-localization of the BOLD signal and  
313 gamma power has been established in previous studies (Brovelli et al., 2005; Foucher et al., 2003;  
314 notably, including co-localization of responses in the insula, cf. Castelhamo et al., 2014).  
315 Our findings align with previous studies that reported increases in intracranially recorded gamma  
316 activity in the FO following (stop-signal) task errors (Bastin et al., 2016). Moreover, gamma band  
317 activity per se is often interpreted as indicating enhanced processing of attended (e.g., task relevant)  
318 sensory information (Clayton et al., 2015; Hipp et al., 2012; Jensen et al., 2007; Siegel et al., 2012). In  
319 other studies, increased gamma power (over mid-frontal sensors) during response competition has  
320 been interpreted as indicating increased cognitive control (Grent-'t-Jong et al., 2013). A Granger  
321 causality analysis by (Chand & Dhamala, 2017) suggested that, during perceptual decision making, the  
322 FO may exert causal influence over fronto-parietal areas within the gamma band.

323 In sum, and in light of the above literature, our fMRI and MEG results suggest that the FO is involved  
324 in performance monitoring during goal-directed hand movements. Notably, while most of the above  
325 studies used trial-by-trial designs, our study featured continuous movements; thus, our results  
326 complement previous literature in showing that the FO shows similar responses in task settings  
327 requiring 'on-line' performance monitoring and adjustment during manual actions. Specifically, we  
328 propose that FO activation (expressed through BOLD signal and gamma power increase) may have  
329 indicated a reaction to task inaccuracy or error, and a corresponding need for behavioural adjustment.  
330 Tentatively, this interpretation is supported by the fact that posterior alpha power behaved opposite  
331 to gamma; i.e., it decreased with increasing inaccuracy (although this effect did not reach statistical  
332 significance, see Results). It is well established that posterior alpha inversely correlates with attention  
333 and task engagement (Bacigalupo & Luck, 2019; Sauseng et al., 2005; Thut, 2006; Yamagishi et al.,  
334 2003).

335 In addition to increased activation of the bilateral FO, our fMRI connectivity analysis revealed that  
336 these areas also increased their *functional coupling* with the right PPC (peak located in the IPL) during  
337 the VH task (phase matching with vision) compared with the RH task (phase matching with  
338 proprioception). An fMRI study by Higo et al. (2011) had used a task requiring attention to faces,  
339 houses, or body parts; and found that the FO increased its functional coupling with visual areas  
340 processing the respective task relevant stimulus category. In our case, however, the FO's connectivity  
341 increase was not with primary and secondary visual cortices, which had shown task (attentional set)  
342 dependent activity increases in our previous studies (Limanowski et al., 2020; Limanowski & Friston,  
343 2020). Instead, FO coupling increased with the IPL of the right PPC; an area that is involved in more  
344 high-level processes including multisensory and sensorimotor integration, and visuo-spatial attention  
345 (Andersen & Buneo, 2002; Malhotra et al., 2009; Wolpert et al., 1998).

346 We propose that this result is related to the fact that visual hand movements were task relevant in the  
347 VH task, but had to be ignored in the RH task (where phase matching was done with proprioception).  
348 Thus, visual feedback was essential for correcting phase matching error in the VH task, but irrelevant  
349 in the RH task. Notably, FO connectivity was not significantly different during periods of visuo-  
350 proprioceptive incongruence; neither did we find significant differences between congruent and  
351 incongruent conditions in the main fMRI GLM analysis. This suggests that the observed VH > RH task  
352 dependent connectivity difference was related to the task-relevant modality being vision >  
353 proprioception per se, rather than to (in)congruence between vision and proprioception. This  
354 interpretation fits with previous work showing that the right PPC, specifically areas in the right IPL, are  
355 critical hubs for executing and correcting visually guided arm movements (Culham et al., 2003; Culham  
356 & Valyear, 2006; Desmurget et al., 1999; Lane et al., 2011; Ogawa et al., 2007; Wenderoth et al., 2004).  
357 Potentially, this effect might have been enhanced by intrinsic differences between the modalities in  
358 relation to error detection; i.e., it might have been easier for participants to notice a phase matching  
359 error when focusing on visual action feedback (VH task) than when focusing on proprioception (RH  
360 task). This could have been due to visual body position estimates being intrinsically less variable than

361 proprioceptive ones (cf. van Beers et al., 1999); and because visual body position was easier to  
362 compare to the visually presented target (however, the target quantity was not visuo-spatial but  
363 abstract; i.e., the oscillatory growing-and-shrinking phase of the fixation dot). When we lowered the  
364 statistical threshold of the main GLM analysis to  $p < 0.005$ , uncorrected, the bilateral FO (the PPI seed  
365 regions) and the right PPC (the PPI target region) showed a stronger correlation with task inaccuracy  
366 under the VH task compared with the RH task. Although this was a weak effect, it could mean that  
367 overall, errors were more easily processed (in those areas) in the VH task. Interestingly, participants  
368 were overall worse in the RH than in the VH task, and performance varied more strongly in the RH task;  
369 this could support the interpretation that proprioceptive performance monitoring was less efficient  
370 than when vision was used. This may also fit with previous reports of increased BOLD signal in the FO  
371 for error trials of which participants were aware, than unaware errors (Harsay et al., 2018; Klein et al.,  
372 2007). Specifically, Harsay et al. (2018) also observed increased functional connectivity of the FO to  
373 the PPC (bilaterally, in addition to the bilateral S1) during aware > unaware errors. In sum, we suggest  
374 that the increased connectivity between the FO and the right PPC during the VH > RH task indicates  
375 the FO signalling an increased need for control and attentional and/or behavioural adjustment  
376 (following poor performance) to visuomotor regions in the right PPC; which could also be related to  
377 how easily those performance deficits could be detected.

378 The above speculations could also explain why we did not observe any connectivity increases of the  
379 FO during the RH > VH task. Accordingly, this could be because participants were less aware of their  
380 phase matching (in)accuracy when performing the task with the unseen real hand. Future work should  
381 evaluate this possibility with specific task designs.

382 Besides activations in the bilateral FO, we also found BOLD signal increases to poor phase matching in  
383 the SMA and the dIPFC (at the junction of middle frontal gyrus and frontal pole). Both areas have been  
384 strongly implied in performance monitoring in other contexts (Ullsperger et al., 2014). The SMA has  
385 been shown to respond to unexpected stimuli, e.g. surprising action outcomes (Krakauer et al., 2004;  
386 Sakai et al., 1999; Scangos et al., 2013; Ullsperger et al., 2010). BOLD signal in the SMA has previously

387 been reported to correlate with positional error in a visuomotor learning task (Grafton et al., 2008)  
388 and in a continuous hand-target tracking (Limanowski et al., 2017). In line with the interpretation  
389 provided in these studies, the SMA activation we observed may indicate an updating of movement  
390 plans in response to poor detected phase matching. Similarly, the lateral PFC is considered a crucial  
391 part of sensorimotor hierarchy (Benchenane et al., 2011; Sokhadze et al., 2012), and is thought to  
392 contribute to performance monitoring and error detection; e.g., by preparing attentional task sets and  
393 comparing behavioural output against them (Cieslik et al., 2015; Danielmeier et al., 2011; Smith et al.,  
394 2019; Ullsperger & von Cramon, 2004). In our experiment, the dlPFC activation could imply similar  
395 underlying ‘high level’ functions.

396 Conversely, we observed that BOLD signal in the contralateral M1 correlated positively with task  
397 accuracy. This effect could be related to the fact that higher task accuracy coincided with more  
398 pronounced hand movements; however, we had included movement amplitude as a regressor of no  
399 interest in our first-level GLMs, which should have largely accounted for this potential bias.  
400 Alternatively, this observation also aligns with the M1’s known role in motor learning (Hardwick et al.,  
401 2013; Panico et al., 2021; Spampinato & Celnik, 2017); with previous findings that M1 activity  
402 correlated with visuomotor adaptation performance (Della-Maggiore & McIntosh, 2005) or with  
403 visuomotor target tracking performance (Ogawa et al., 2006); and with the fact that a perturbation of  
404 the M1 via transcranial magnetic stimulation (TMS) resulted in reduced sensorimotor adaption (Orban  
405 de Xivry et al., 2011).

406 Finally, it should be noted that our results should be compared to previous studies with some caution,  
407 since our task was designed around continuous movements; therefore, we could not isolate specific  
408 time points—and neuronal correlates—that would clearly correspond to specific cognitive or motor  
409 processes like e.g. error detection or correction. Future trial-by-trial task designs should therefore try  
410 to validate our interpretation.

411 In conclusion, our results suggest a critical role for the bilateral FO in performance monitoring during  
412 manual action; and that following errors in visually guided manual action specifically, the FO may signal  
413 an increased need for control to visuomotor regions in the right PPC.

## Conflict of interest

The authors declare no conflict of interest.

## Acknowledgments

Funded by the German Research Foundation (DFG, Deutsche Forschungsgemeinschaft) as part of Germany's Excellence Strategy – EXC 2050/1 – Project ID 390696704 – Cluster of Excellence “Centre for Tactile Internet with Human-in-the-Loop” (CeTI) of Technische Universität Dresden. JL is funded by a Freigeist Fellowship of the VolkswagenStiftung (AZ 97-932). Figure 1 reprinted from: Limanowski *et al.*, *Neuroimage*, 222, p. 117267, Copyright Elsevier (2020) under the terms of the Creative Commons CC-BY license.

## References

- 414 Allen, M., Fardo, F., Dietz, M. J., Hillebrandt, H., Friston, K. J., Rees, G., & Roepstorff, A. (2016).  
415 Anterior insula coordinates hierarchical processing of tactile mismatch responses.  
416 *NeuroImage*, 127, 34–43. <https://doi.org/10.1016/j.neuroimage.2015.11.030>
- 417 Andersen, R. A., & Buneo, C. A. (2002). Intentional Maps in Posterior Parietal Cortex. *Annual Review*  
418 *of Neuroscience*, 25(1), 189–220. <https://doi.org/10.1146/annurev.neuro.25.112701.142922>
- 419 Bacigalupo, F., & Luck, S. J. (2019). Lateralized Suppression of Alpha-Band EEG Activity As a  
420 Mechanism of Target Processing. *The Journal of Neuroscience*, 39(5), 900–917.  
421 <https://doi.org/10.1523/JNEUROSCI.0183-18.2018>
- 422 Bastin, J., Deman, P., David, O., Gueguen, M., Benis, D., Minotti, L., Hoffman, D., Combrisson, E.,  
423 Kujala, J., Perrone-Bertolotti, M., Kahane, P., Lachaux, J.-P., & Jerbi, K. (2016). Direct  
424 Recordings from Human Anterior Insula Reveal its Leading Role within the Error-Monitoring  
425 Network. *Cerebral Cortex*, bhv352. <https://doi.org/10.1093/cercor/bhv352>
- 426 Belardinelli, P., Ortiz, E., Barnes, G., Noppeney, U., & Preissl, H. (2012). Source Reconstruction  
427 Accuracy of MEG and EEG Bayesian Inversion Approaches. *PLoS ONE*, 7(12), e51985.  
428 <https://doi.org/10.1371/journal.pone.0051985>
- 429 Benchenane, K., Tiesinga, P. H., & Battaglia, F. P. (2011). Oscillations in the prefrontal cortex: A  
430 gateway to memory and attention. *Current Opinion in Neurobiology*, 21(3), 475–485.  
431 <https://doi.org/10.1016/j.conb.2011.01.004>
- 432 Billeke, P., Ossandon, T., Perrone-Bertolotti, M., Kahane, P., Bastin, J., Jerbi, K., Lachaux, J.-P., &  
433 Fuentealba, P. (2020). Human Anterior Insula Encodes Performance Feedback and Relays  
434 Prediction Error to the Medial Prefrontal Cortex. *Cerebral Cortex*, 30(7), 4011–4025.  
435 <https://doi.org/10.1093/cercor/bhaa017>
- 436 Brovelli, A., Lachaux, J.-P., Kahane, P., & Boussaoud, D. (2005). High gamma frequency oscillatory  
437 activity dissociates attention from intention in the human premotor cortex. *NeuroImage*,  
438 28(1), 154–164. <https://doi.org/10.1016/j.neuroimage.2005.05.045>

- 439 Bunge, S. A., Dudukovic, N. M., Thomason, M. E., Vaidya, C. J., & Gabrieli, J. D. E. (2015). *Immature*  
440 *Frontal Lobe Contributions to Cognitive Control in Children: Evidence from fMRI*. 25.
- 441 Castelhana, J., Duarte, I. C., Wibrál, M., Rodriguez, E., & Castelo-Branco, M. (2014). The dual facet of  
442 gamma oscillations: Separate visual and decision making circuits as revealed by simultaneous  
443 EEG/fMRI. *Human Brain Mapping, 35*(10), 5219–5235. <https://doi.org/10.1002/hbm.22545>
- 444 Chand, G. B., & Dhamala, M. (2017). Interactions between the anterior cingulate-insula network and  
445 the fronto-parietal network during perceptual decision-making. *NeuroImage, 152*, 381–389.  
446 <https://doi.org/10.1016/j.neuroimage.2017.03.014>
- 447 Cieslik, E. C., Mueller, V. I., Eickhoff, C. R., Langner, R., & Eickhoff, S. B. (2015). Three key regions for  
448 supervisory attentional control: Evidence from neuroimaging meta-analyses. *Neuroscience &*  
449 *Biobehavioral Reviews, 48*, 22–34. <https://doi.org/10.1016/j.neubiorev.2014.11.003>
- 450 Clayton, M. S., Yeung, N., & Cohen Kadosh, R. (2015). The roles of cortical oscillations in sustained  
451 attention. *Trends in Cognitive Sciences, 19*(4), 188–195.  
452 <https://doi.org/10.1016/j.tics.2015.02.004>
- 453 Culham, J. C., Danckert, S. L., Souza, J. F. X. D., Gati, J. S., Menon, R. S., & Goodale, M. A. (2003).  
454 Visually guided grasping produces fMRI activation in dorsal but not ventral stream brain  
455 areas. *Experimental Brain Research, 153*(2), 180–189. [https://doi.org/10.1007/s00221-003-](https://doi.org/10.1007/s00221-003-1591-5)  
456 [1591-5](https://doi.org/10.1007/s00221-003-1591-5)
- 457 Culham, J. C., & Valyear, K. F. (2006). Human parietal cortex in action. *Current Opinion in*  
458 *Neurobiology, 16*(2), 205–212. <https://doi.org/10.1016/j.conb.2006.03.005>
- 459 Danielmeier, C., Eichele, T., Forstmann, B. U., Tittgemeyer, M., & Ullsperger, M. (2011). Posterior  
460 Medial Frontal Cortex Activity Predicts Post-Error Adaptations in Task-Related Visual and  
461 Motor Areas. *Journal of Neuroscience, 31*(5), 1780–1789.  
462 <https://doi.org/10.1523/JNEUROSCI.4299-10.2011>



- 463 Della-Maggiore, V., & McIntosh, A. R. (2005). Time Course of Changes in Brain Activity and Functional  
464 Connectivity Associated With Long-Term Adaptation to a Rotational Transformation. *Journal*  
465 *of Neurophysiology*, 93(4), 2254–2262. <https://doi.org/10.1152/jn.00984.2004>
- 466 Desmurget, M., Epstein, C. M., Turner, R. S., Prablanc, C., Alexander, G. E., & Grafton, S. T. (1999).  
467 Role of the posterior parietal cortex in updating reaching movements to a visual target.  
468 *Nature Neuroscience*, 2(6), 563–567. <https://doi.org/10.1038/9219>
- 469 Diedrichsen, J. (2005). Neural Correlates of Reach Errors. *Journal of Neuroscience*, 25(43), 9919–  
470 9931. <https://doi.org/10.1523/JNEUROSCI.1874-05.2005>
- 471 Donner, T. H., & Siegel, M. (2011). A framework for local cortical oscillation patterns. *Trends in*  
472 *Cognitive Sciences*, 15(5), 191–199. <https://doi.org/10.1016/j.tics.2011.03.007>
- 473 Eichele, T., Debener, S., Calhoun, V. D., Specht, K., Engel, A. K., Hugdahl, K., von Cramon, D. Y., &  
474 Ullsperger, M. (2008). Prediction of human errors by maladaptive changes in event-related  
475 brain networks. *Proceedings of the National Academy of Sciences*, 105(16), 6173–6178.  
476 <https://doi.org/10.1073/pnas.0708965105>
- 477 Eickhoff, S. B., Stephan, K. E., Mohlberg, H., Grefkes, C., Fink, G. R., Amunts, K., & Zilles, K. (2005). A  
478 new SPM toolbox for combining probabilistic cytoarchitectonic maps and functional imaging  
479 data. *NeuroImage*, 25(4), 1325–1335. <https://doi.org/10.1016/j.neuroimage.2004.12.034>
- 480 Foucher, J. R., Otzenberger, H., & Gounot, D. (2003). The BOLD response and the gamma oscillations  
481 respond differently than evoked potentials: An interleaved EEG-fMRI study. *BMC*  
482 *Neuroscience*, 11.
- 483 Friston, K. J., Buechel, C., Fink, G. R., Morris, J., Rolls, E., & Dolan, R. J. (1997). Psychophysiological and  
484 Modulatory Interactions in Neuroimaging. *NeuroImage*, 6(3), 218–229.  
485 <https://doi.org/10.1006/nimg.1997.0291>
- 486 Friston, K. J., Preller, K. H., Mathys, C., Cagnan, H., Heinzle, J., Razi, A., & Zeidman, P. (2019). Dynamic  
487 causal modelling revisited. *NeuroImage*, 199, 730–744.  
488 <https://doi.org/10.1016/j.neuroimage.2017.02.045>

- 489 Grafton, S. T., Schmitt, P., Van Horn, J., & Diedrichsen, J. (2008). Neural substrates of visuomotor  
490 learning based on improved feedback control and prediction. *NeuroImage*, *39*(3), 1383–  
491 1395. <https://doi.org/10.1016/j.neuroimage.2007.09.062>
- 492 Grent-'t-Jong, T., Oostenveld, R., Jensen, O., Medendorp, W. P., & Praamstra, P. (2013). Oscillatory  
493 dynamics of response competition in human sensorimotor cortex. *NeuroImage*, *83*, 27–34.  
494 <https://doi.org/10.1016/j.neuroimage.2013.06.051>
- 495 Ham, T., Leff, A., de Boissezon, X., Joffe, A., & Sharp, D. J. (2013). Cognitive Control and the Salience  
496 Network: An Investigation of Error Processing and Effective Connectivity. *Journal of*  
497 *Neuroscience*, *33*(16), 7091–7098. <https://doi.org/10.1523/JNEUROSCI.4692-12.2013>
- 498 Hardwick, R. M., Rottschy, C., Miall, R. C., & Eickhoff, S. B. (2013). A quantitative meta-analysis and  
499 review of motor learning in the human brain. *NeuroImage*, *67*, 283–297.  
500 <https://doi.org/10.1016/j.neuroimage.2012.11.020>
- 501 Harsay, H. A., Cohen, M. X., Spaan, M., Weeda, W. D., Nieuwenhuis, S., & Ridderinkhof, K. R. (2018).  
502 Error blindness and motivational significance: Shifts in networks centering on anterior insula  
503 co-vary with error awareness and pupil dilation. *Behavioural Brain Research*, *355*, 24–35.  
504 <https://doi.org/10.1016/j.bbr.2017.10.030>
- 505 Henson, R. N., Flandin, G., Friston, K. J., & Mattout, J. (2010). A Parametric Empirical Bayesian  
506 framework for fMRI-constrained MEG/EEG source reconstruction. *Human Brain Mapping*,  
507 *31*(10), 1512–1531. <https://doi.org/10.1002/hbm.20956>
- 508 Higo, T., Mars, R. B., Boorman, E. D., Buch, E. R., & Rushworth, M. F. S. (2011). Distributed and causal  
509 influence of frontal operculum in task control. *Proceedings of the National Academy of*  
510 *Sciences*, *108*(10), 4230–4235. <https://doi.org/10.1073/pnas.1013361108>
- 511 Hipp, J. F., Hawellek, D. J., Corbetta, M., Siegel, M., & Engel, A. K. (2012). Large-scale cortical  
512 correlation structure of spontaneous oscillatory activity. *Nature Neuroscience*, *15*(6), 884–  
513 890. <https://doi.org/10.1038/nn.3101>

- 514 Jensen, O., Kaiser, J., & Lachaux, J.-P. (2007). Human gamma-frequency oscillations associated with  
515 attention and memory. *Trends in Neurosciences*, 30(7), 317–324.  
516 <https://doi.org/10.1016/j.tins.2007.05.001>
- 517 Kilner, J. M., & Friston, K. J. (2010). Topological inference for EEG and MEG. *The Annals of Applied*  
518 *Statistics*, 4(3). <https://doi.org/10.1214/10-AOAS337>
- 519 Klein, T. A., Endrass, T., Kathmann, N., Neumann, J., von Cramon, D. Y., & Ullsperger, M. (2007).  
520 Neural correlates of error awareness. *NeuroImage*, 34(4), 1774–1781.  
521 <https://doi.org/10.1016/j.neuroimage.2006.11.014>
- 522 Klein, T. A., Ullsperger, M., & Danielmeier, C. (2013). Error awareness and the insula: Links to  
523 neurological and psychiatric diseases. *Frontiers in Human Neuroscience*, 7.  
524 <https://doi.org/10.3389/fnhum.2013.00014>
- 525 Krakauer, J. W., Ghilardi, M.-F., Mentis, M., Barnes, A., Veytsman, M., Eidelberg, D., & Ghez, C.  
526 (2004). Differential Cortical and Subcortical Activations in Learning Rotations and Gains for  
527 Reaching: A PET Study. *Journal of Neurophysiology*, 91(2), 924–933.  
528 <https://doi.org/10.1152/jn.00675.2003>
- 529 Lane, A. R., Smith, D. T., Schenk, T., & Ellison, A. (2011). The Involvement of Posterior Parietal Cortex  
530 in Feature and Conjunction Visuomotor Search. *Journal of Cognitive Neuroscience*, 23(8),  
531 1964–1972. <https://doi.org/10.1162/jocn.2010.21576>
- 532 Langner, R., & Eickhoff, S. B. (2013). Sustaining attention to simple tasks: A meta-analytic review of  
533 the neural mechanisms of vigilant attention. *Psychological Bulletin*, 139(4), 870–900.  
534 <https://doi.org/10.1037/a0030694>
- 535 Lebar, N., Danna, J., Moré, S., Mouchnino, L., & Blouin, J. (2017). On the neural basis of sensory  
536 weighting: Alpha, beta and gamma modulations during complex movements. *NeuroImage*,  
537 150, 200–212. <https://doi.org/10.1016/j.neuroimage.2017.02.043>
- 538 Limanowski, J., & Friston, K. (2020). Attentional Modulation of Vision Versus Proprioception During  
539 Action. *Cerebral Cortex*, 30(3), 1637–1648. <https://doi.org/10.1093/cercor/bhz192>

- 540 Limanowski, J., Kirilina, E., & Blankenburg, F. (2017). Neuronal correlates of continuous manual  
541 tracking under varying visual movement feedback in a virtual reality environment.  
542 *NeuroImage*, 146, 81–89. <https://doi.org/10.1016/j.neuroimage.2016.11.009>
- 543 Limanowski, J., Litvak, V., & Friston, K. (2020). Cortical beta oscillations reflect the contextual gating  
544 of visual action feedback. *NeuroImage*, 222, 117267.  
545 <https://doi.org/10.1016/j.neuroimage.2020.117267>
- 546 Litvak, V., & Friston, K. (2008). Electromagnetic source reconstruction for group studies. *NeuroImage*,  
547 42(4), 1490–1498. <https://doi.org/10.1016/j.neuroimage.2008.06.022>
- 548 López, J. D., Litvak, V., Espinosa, J. J., Friston, K., & Barnes, G. R. (2014). Algorithmic procedures for  
549 Bayesian MEG/EEG source reconstruction in SPM. *NeuroImage*, 84, 476–487.  
550 <https://doi.org/10.1016/j.neuroimage.2013.09.002>
- 551 Malhotra, P., Coulthard, E. J., & Husain, M. (2009). Role of right posterior parietal cortex in  
552 maintaining attention to spatial locations over time. *Brain*, 132(3), 645–660.  
553 <https://doi.org/10.1093/brain/awn350>
- 554 Menon, V., & Uddin, L. Q. (2010). Saliency, switching, attention and control: A network model of  
555 insula function. *Brain Structure and Function*, 214(5–6), 655–667.  
556 <https://doi.org/10.1007/s00429-010-0262-0>
- 557 Moran, R. J., Stephan, K. E., Kiebel, S. J., Rombach, N., O'Connor, W. T., Murphy, K. J., Reilly, R. B., &  
558 Friston, K. J. (2008). *Bayesian estimation of synaptic physiology from the spectral responses*  
559 *of neural masses*. 13.
- 560 Ogawa, K., Inui, T., & Sugio, T. (2006). Separating brain regions involved in internally guided and  
561 visual feedback control of moving effectors: An event-related fMRI study. *NeuroImage*, 32(4),  
562 1760–1770. <https://doi.org/10.1016/j.neuroimage.2006.05.012>
- 563 Ogawa, K., Inui, T., & Sugio, T. (2007). Neural Correlates of State Estimation in Visually Guided  
564 Movements: An Event-Related FMRI Study. *Cortex*, 43(3), 289–300.  
565 [https://doi.org/10.1016/S0010-9452\(08\)70455-6](https://doi.org/10.1016/S0010-9452(08)70455-6)

- 566 Orban de Xivry, J.-J., Criscimagna-Hemminger, S. E., & Shadmehr, R. (2011). Contributions of the  
567 Motor Cortex to Adaptive Control of Reaching Depend on the Perturbation Schedule.  
568 *Cerebral Cortex*, 21(7), 1475–1484. <https://doi.org/10.1093/cercor/bhq192>
- 569 O'Reilly, J. X., Woolrich, M. W., Behrens, T. E. J., Smith, S. M., & Johansen-Berg, H. (2012). Tools of the  
570 trade: Psychophysiological interactions and functional connectivity. *Social Cognitive and*  
571 *Affective Neuroscience*, 7(5), 604–609. <https://doi.org/10.1093/scan/nss055>
- 572 Panico, F., Fleury, L., Trojano, L., & Rossetti, Y. (2021). Prism Adaptation in M1. *Journal of Cognitive*  
573 *Neuroscience*, 33(4), 563–573. [https://doi.org/10.1162/jocn\\_a\\_01668](https://doi.org/10.1162/jocn_a_01668)
- 574 Sakai, K., Hikosaka, O., Miyauchi, S., Sasaki, Y., Fujimaki, N., & Pütz, B. (1999). Presupplementary  
575 Motor Area Activation during Sequence Learning Reflects Visuo-Motor Association. *The*  
576 *Journal of Neuroscience*, 19(10), RC1–RC1. [https://doi.org/10.1523/JNEUROSCI.19-10-](https://doi.org/10.1523/JNEUROSCI.19-10-j0002.1999)  
577 [j0002.1999](https://doi.org/10.1523/JNEUROSCI.19-10-j0002.1999)
- 578 Sauseng, P., Klimesch, W., Stadler, W., Schabus, M., Doppelmayr, M., Hanslmayr, S., Gruber, W. R., &  
579 Birbaumer, N. (2005). A shift of visual spatial attention is selectively associated with human  
580 EEG alpha activity. *European Journal of Neuroscience*, 22(11), 2917–2926.  
581 <https://doi.org/10.1111/j.1460-9568.2005.04482.x>
- 582 Scangos, K. W., Aronberg, R., & Stuphorn, V. (2013). Performance monitoring by presupplementary  
583 and supplementary motor area during an arm movement countermanding task. *Journal of*  
584 *Neurophysiology*, 109(7), 1928–1939. <https://doi.org/10.1152/jn.00688.2012>
- 585 Seeley, W. W., Menon, V., Schatzberg, A. F., Keller, J., Glover, G. H., Kenna, H., Reiss, A. L., & Greicius,  
586 M. D. (2007). Dissociable Intrinsic Connectivity Networks for Salience Processing and  
587 Executive Control. *Journal of Neuroscience*, 27(9), 2349–2356.  
588 <https://doi.org/10.1523/JNEUROSCI.5587-06.2007>
- 589 Siegel, M., Donner, T. H., & Engel, A. K. (2012). Spectral fingerprints of large-scale neuronal  
590 interactions. *Nature Reviews Neuroscience*, 13(2), 121–134. <https://doi.org/10.1038/nrn3137>

- 591 Smith, E. H., Horga, G., Yates, M. J., Mikell, C. B., Banks, G. P., Pathak, Y. J., Schevon, C. A., McKhann,  
592 G. M., Hayden, B. Y., Botvinick, M. M., & Sheth, S. A. (2019). Widespread temporal coding of  
593 cognitive control in the human prefrontal cortex. *Nature Neuroscience*, *22*(11), 1883–1891.  
594 <https://doi.org/10.1038/s41593-019-0494-0>
- 595 Sober, S. J., & Sabes, P. N. (2005). Flexible strategies for sensory integration during motor planning.  
596 *Nature Neuroscience*, *8*(4), 490–497. <https://doi.org/10.1038/nn1427>
- 597 Sokhadze, E. M., Baruth, J. M., Sears, L., Sokhadze, G. E., El-Baz, A. S., & Casanova, M. F. (2012).  
598 Prefrontal Neuromodulation Using rTMS Improves Error Monitoring and Correction Function  
599 in Autism. *Applied Psychophysiology and Biofeedback*, *37*(2), 91–102.  
600 <https://doi.org/10.1007/s10484-012-9182-5>
- 601 Spampinato, D., & Celnik, P. (2017). Temporal dynamics of cerebellar and motor cortex physiological  
602 processes during motor skill learning. *Scientific Reports*, *7*(1), 40715.  
603 <https://doi.org/10.1038/srep40715>
- 604 Sridharan, D., Levitin, D. J., & Menon, V. (2008). A critical role for the right fronto-insular cortex in  
605 switching between central-executive and default-mode networks. *Proceedings of the*  
606 *National Academy of Sciences*, *105*(34), 12569–12574.  
607 <https://doi.org/10.1073/pnas.0800005105>
- 608 Suminski, A. J., Rao, S. M., Mosier, K. M., & Scheidt, R. A. (2007). Neural and Electromyographic  
609 Correlates of Wrist Posture Control. *Journal of Neurophysiology*, *97*(2), 1527–1545.  
610 <https://doi.org/10.1152/jn.01160.2006>
- 611 Thomson, D. J. (1982). Spectrum estimation and harmonic analysis. *Proceedings of the IEEE*, *70*(9),  
612 1055–1096. <https://doi.org/10.1109/PROC.1982.12433>
- 613 Thut, G. (2006).  $\alpha$ -Band Electroencephalographic Activity over Occipital Cortex Indexes Visuospatial  
614 Attention Bias and Predicts Visual Target Detection. *Journal of Neuroscience*, *26*(37), 9494–  
615 9502. <https://doi.org/10.1523/JNEUROSCI.0875-06.2006>

- 616 Uddin, L. Q. (2021). Cognitive and behavioural flexibility: Neural mechanisms and clinical  
617 considerations. *Nature Reviews Neuroscience*, 22(3), 167–179.  
618 <https://doi.org/10.1038/s41583-021-00428-w>
- 619 Ullsperger, M., Danielmeier, C., & Jocham, G. (2014). Neurophysiology of Performance Monitoring  
620 and Adaptive Behavior. *Physiological Reviews*, 94(1), 35–79.  
621 <https://doi.org/10.1152/physrev.00041.2012>
- 622 Ullsperger, M., Harsay, H. A., Wessel, J. R., & Ridderinkhof, K. R. (2010). Conscious perception of  
623 errors and its relation to the anterior insula. *Brain Structure and Function*, 214(5–6), 629–  
624 643. <https://doi.org/10.1007/s00429-010-0261-1>
- 625 Ullsperger, M., & von Cramon, D. Y. (2004). Neuroimaging of Performance Monitoring: Error  
626 Detection and Beyond. *Cortex*, 40(4–5), 593–604. [https://doi.org/10.1016/S0010-](https://doi.org/10.1016/S0010-9452(08)70155-2)  
627 [9452\(08\)70155-2](https://doi.org/10.1016/S0010-9452(08)70155-2)
- 628 van Beers, R. J., Sittig, A. C., & Gon, J. J. D. van der. (1999). Integration of Proprioceptive and Visual  
629 Position-Information: An Experimentally Supported Model. *Journal of Neurophysiology*,  
630 81(3), 1355–1364. <https://doi.org/10.1152/jn.1999.81.3.1355>
- 631 Wager, T. D., Sylvester, C.-Y. C., Lacey, S. C., Nee, D. E., Franklin, M., & Jonides, J. (2005). Common  
632 and unique components of response inhibition revealed by fMRI. *NeuroImage*, 27(2), 323–  
633 340. <https://doi.org/10.1016/j.neuroimage.2005.01.054>
- 634 Wenderoth, N., Debaere, F., Sunaert, S., Hecke, P. van, & Swinnen, S. P. (2004). Parieto-premotor  
635 Areas Mediate Directional Interference During Bimanual Movements. *Cerebral Cortex*,  
636 14(10), 1153–1163. <https://doi.org/10.1093/cercor/bhh075>
- 637 Wolpert, D. M., Goodbody, S. J., & Husain, M. (1998). Maintaining internal representations: The role  
638 of the human superior parietal lobe. *Nature Neuroscience*, 1(6), 529–533.  
639 <https://doi.org/10.1038/2245>

640 Yamagishi, N., Callan, D. E., Goda, N., Anderson, S. J., Yoshida, Y., & Kawato, M. (2003). Attentional  
641 modulation of oscillatory activity in human visual cortex. *NeuroImage*, 20(1), 98–113.  
642 [https://doi.org/10.1016/S1053-8119\(03\)00341-0](https://doi.org/10.1016/S1053-8119(03)00341-0)
